# Supplementary material for: Oral Rehabilitation of Hypodontia Patients Using an Endosseous Dental Implant: Functional and Aesthetic Results
Source: J Clin Med. 2019 Oct 15;8(10):1687. doi: 10.3390/jcm8101687 (PMC6832447; doi:10.3390/jcm8101687)
Supplement: Supplementary file 1 [file jcm-08-01687-s001.pdf]

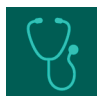

**Table S1.** Number of implants per region and type of replaced tooth.

| Type of teeth | Position                              | Number | Total |
|---------------|---------------------------------------|--------|-------|
| Incisors      | 12 (right maxillary lateral incisor)  | 17     | 50    |
|               | 22 (left maxillary lateral incisor)   | 17     |       |
|               | 32 (left mandibular lateral incisor)  | 6      |       |
|               | 31 (left mandibular central incisor)  | 3      |       |
|               | 41 (right mandibular central incisor) | 2      |       |
|               | 42 (right mandibular lateral incisor) | 5      |       |
| Canines       | 13 (right maxillary canine)           | 6      | 21    |
|               | 23 (left maxillary canine)            | 6      |       |
|               | 33 (left mandibular canine)           | 5      |       |
|               | 43 (right mandibular canine)          | 4      |       |
| Premolars     | 15 (right maxillary second premolar)  | 10     | 68    |
|               | 14 (right maxillary first premolar)   | 7      |       |
|               | 24 (left maxillary first premolar)    | 6      |       |
|               | 25 (left maxillary second premolar)   | 10     |       |
|               | 35 (left mandibular second premolar)  | 14     |       |
|               | 34 (left mandibular first premolar)   | 5      |       |
|               | 44 (right mandibular first premolar)  | 4      |       |
|               | 45 (right mandibular second premolar) | 12     |       |
| Molars        | 17 (right maxillary second molar)     | 3      | 16    |
|               | 16 (right maxillary first molar)      | 2      |       |
|               | 26 (left maxillary first molar)       | 1      |       |
|               | 27 (left maxillary second molar)      | 1      |       |
|               | 37 (left mandibular second molar)     | 2      |       |
|               | 36 (left mandibula first molar)       | 3      |       |
|               | 46 (right mandibular first molar)     | 3      |       |
|               | 47 (right mandibular second molar)    | 1      |       |
